# Supplementary material
Source: Springer Nature journal article supplement (https://www.springermedizin.de/resource/supplementary/12943_2010_692_MOESM6_ESM.pdf/9554600)

**CD3<sup>+</sup>casp3<sup>+</sup>casp8<sup>+</sup>NfkB<sup>+</sup>**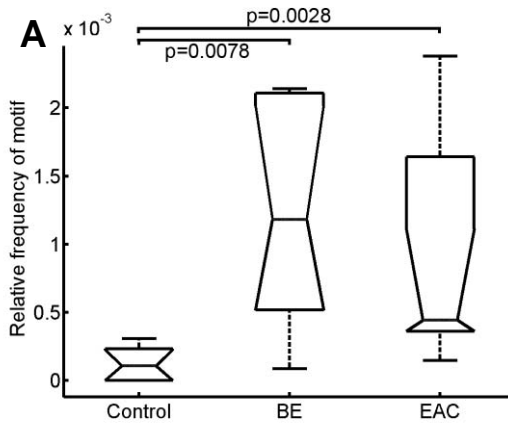**CD45RA<sup>+</sup>CD8<sup>-</sup>casp3<sup>+</sup>casp8<sup>+</sup>NfkB<sup>+</sup>**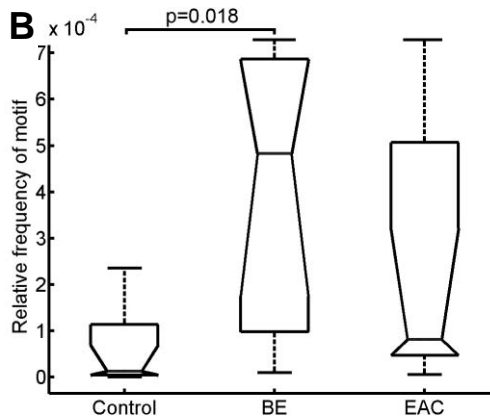**CD45R0<sup>+</sup>CD8<sup>-</sup>casp3<sup>+</sup>casp8<sup>+</sup>NfkB<sup>+</sup>**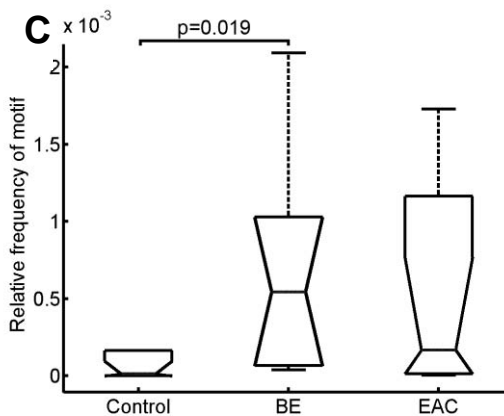**CD4<sup>+</sup>CD8<sup>-</sup>casp3<sup>+</sup>casp8<sup>+</sup>NfkB<sup>+</sup>**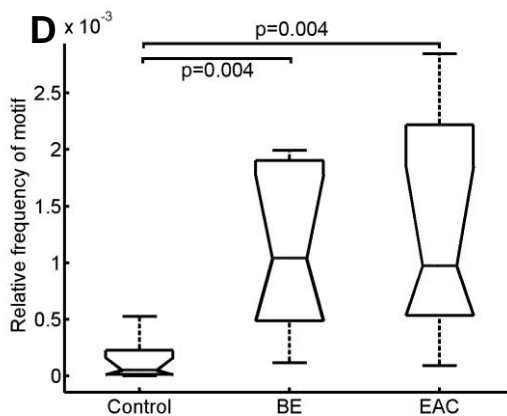**CD4<sup>+</sup>CD25<sup>+</sup>CD8<sup>-</sup>casp3<sup>+</sup>casp8<sup>+</sup>NfkB<sup>+</sup>**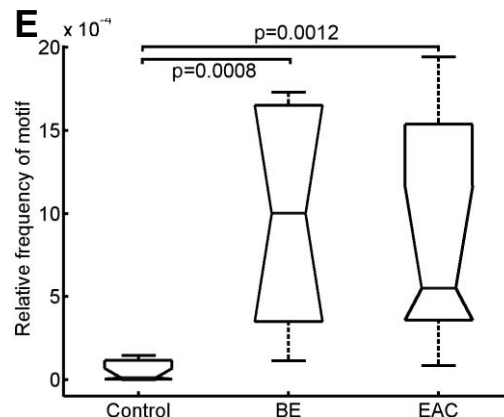**CD8<sup>+</sup>CD4<sup>-</sup>casp3<sup>+</sup>casp8<sup>+</sup>NfkB<sup>+</sup>**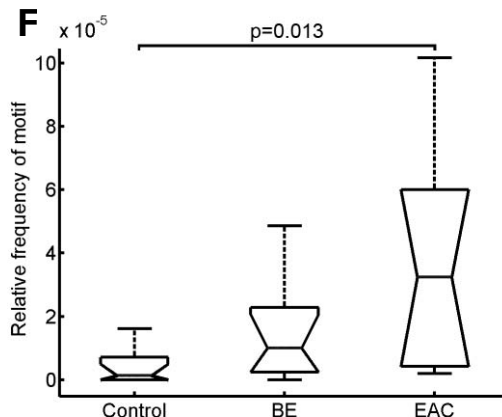

Supplement: MOESM6 [file 9554600]
